# Supplementary material for: Synthesis of [PtCl2(4,4′-dialkoxy-2,2′-bipyridine)] complexes and their in vitro anticancer properties
Source: Royal Society of Chemistry journal article supplement (doi:10.1039/c3mt00128h), 2013-01-01
Supplement: c3mt00128h.pdf [file c3mt00128h.pdf]

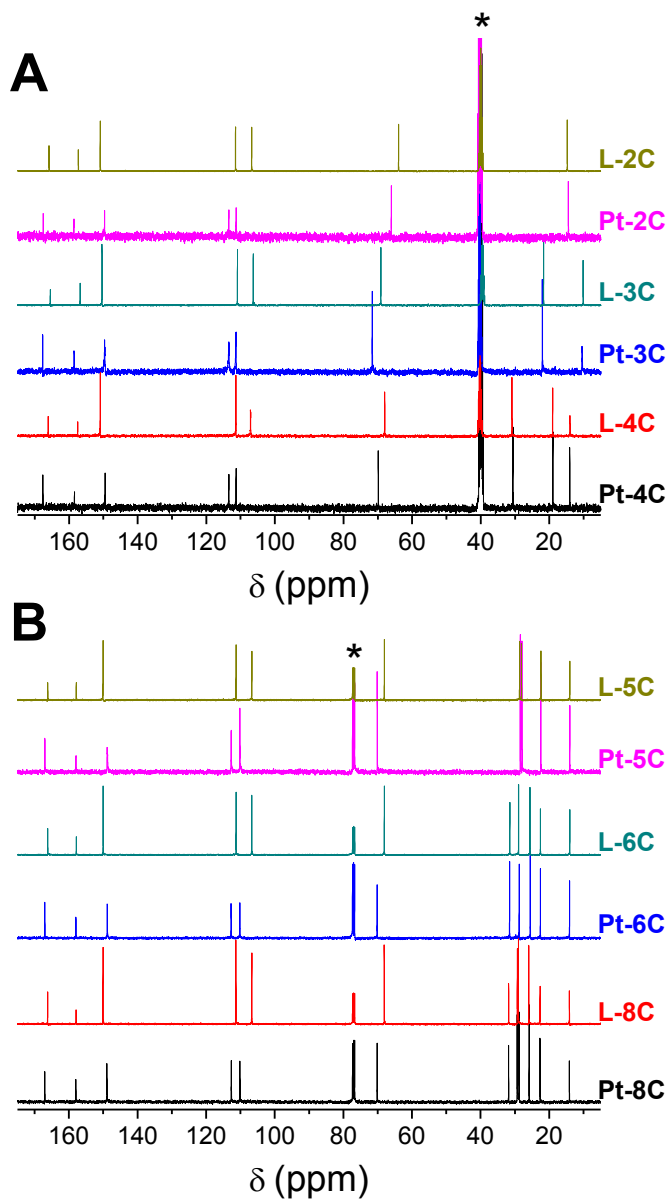

**Fig. S1**  $^{13}\text{C}$  NMR spectra of ligands and Pt(II)-complexes recorded in A)  $\text{DMSO-}d_6$  and B)  $\text{CDCl}_3$  at temperatures indicated in the experimental section (\* solvent peak).

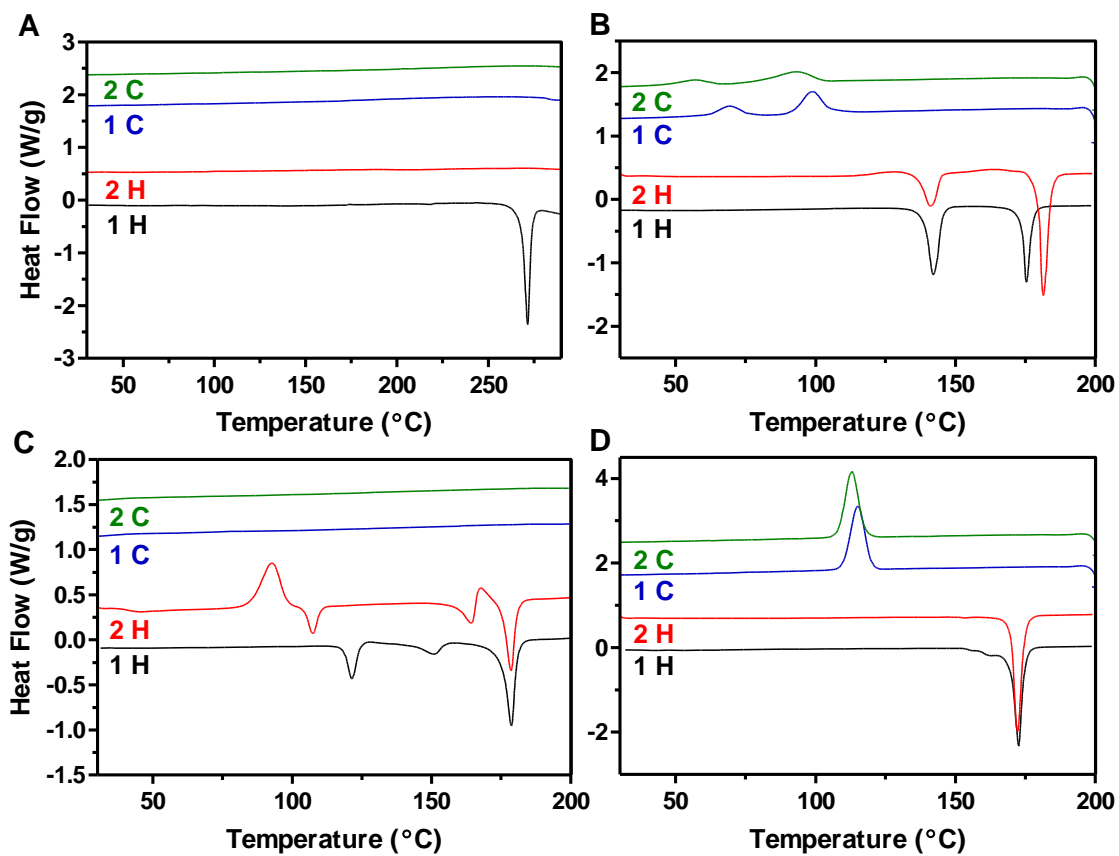

**Fig. S2** DSC thermograms of A) Pt-3C, B) Pt-5C, C) Pt-6C, and D) Pt-8C obtained in nitrogen at heating and cooling rates of 10 °C/min.
